# Supplementary material for: The Effectiveness of the AI-Based Pragmatic Model in Improving English Creative Writing Skills Among Third-Year High School Students in Riyadh
Source: Research Square preprint supplement (doi:10.21203/rs.3.rs-6445869/v1), 2025-06-16
Supplement: Supplementary file 1 [file 466314e9f1a6af42a4bf6109.docx]

**"Terminal comparison validity"**

| **Ranks** | | | | |
| --- | --- | --- | --- | --- |
|  | The two groups | N | Mean Rank | Sum of Ranks |
| Skill 1 | high | 6 | 9.50 | 57.00 |
| low | 6 | 3.50 | 21.00 |
| Total | 12 |  |  |
| Skill 2 | high | 6 | 9.42 | 56.50 |
| low | 6 | 3.58 | 21.50 |
| Total | 12 |  |  |
| Skill 3 | high | 6 | 9.33 | 56.00 |
| low | 6 | 3.67 | 22.00 |
| Total | 12 |  |  |
| Skill 4 | high | 6 | 9.50 | 57.00 |
| low | 6 | 3.50 | 21.00 |
| Total | 12 |  |  |
| Skill 5 | high | 6 | 9.50 | 57.00 |
| low | 6 | 3.50 | 21.00 |
| Total | 12 |  |  |
| Totall | high | 6 | 9.50 | 57.00 |
| low | 6 | 3.50 | 21.00 |
| Total | 12 |  |  |

| **Test Statisticsa** | | | | | | |
| --- | --- | --- | --- | --- | --- | --- |
|  | Skill1 | Skill2 | Skill 3 | Skill 4 | Skill | Totall |
| Mann-Whitney U | .000 | .500 | 1.000 | .000 | .000 | .000 |
| Wilcoxon W | 21.000 | 21.500 | 22.000 | 21.000 | 21.000 | 21.000 |
| Z | 3.083- | 2.827- | 2.766- | 2.934- | 2.918- | 2.892- |
| Asymp. Sig. (2-tailed) | .002 | .005 | .006 | .003 | .004 | .004 |
| Exact Sig. [2*(1-tailed Sig.)] | .002b | .002b | .004b | .002b | .002b | .002b |
| a. Grouping Variable: Tow Groups | | | | | | |
| b. Not corrected for ties. | | | | | | |

| **Group Statistics** | | | | | |
| --- | --- | --- | --- | --- | --- |
|  | Groups | N | Mean | Std. Deviation | Std. Error Mean |
| Skill1 | اhigh | 6 | 6.0000 | 2.09762 | .85635 |
| Low | 6 | 2.0000 | .00000 | .00000 |
| Skill2 | high | 6 | 5.5000 | 1.04881 | .42817 |
| low | 6 | 2.1667 | 1.16905 | .47726 |
| Skill 3 | high | 6 | 5.8333 | 1.94079 | .79232 |
| low | 6 | 2.6667 | .81650 | .33333 |
| Skill 4 | high | 6 | 6.1667 | 1.32916 | .54263 |
| low | 6 | 2.3333 | .81650 | .33333 |
| Skill 5 | high | 6 | 5.3333 | 1.21106 | .49441 |
| low | 6 | 2.3333 | .81650 | .33333 |
| Totall | high | 6 | 28.8333 | 1.47196 | .60093 |
| low | 6 | 11.5000 | 3.01662 | 1.23153 |

**"Consistency validity with the total score"**

| **Correlations** | | | | | | | |
| --- | --- | --- | --- | --- | --- | --- | --- |
|  | | Skill 1 | Skill 2 | Skill 3 | Skill 4 | Skill 5 | Totall |
| Skill 1 | Pearson Correlation | 1 | .331 | .301 | .405 | .469* | .669** |
| Sig. (2-tailed) |  | .132 | .173 | .062 | .028 | .001 |
| N | 22 | 22 | 22 | 22 | 22 | 22 |
| Skill 2 | Pearson Correlation | .331 | 1 | .349 | .535* | .453* | .722** |
| Sig. (2-tailed) | .132 |  | .111 | .010 | .034 | .000 |
| N | 22 | 22 | 22 | 22 | 22 | 22 |
| Skill 3 | Pearson Correlation | .301 | .349 | 1 | .408 | .512* | .684** |
| Sig. (2-tailed) | .173 | .111 |  | .059 | .015 | .000 |
| N | 22 | 22 | 22 | 22 | 22 | 22 |
| Skill 4 | Pearson Correlation | .405 | .535* | .408 | 1 | .812** | .838** |
| Sig. (2-tailed) | .062 | .010 | .059 |  | .000 | .000 |
| N | 22 | 22 | 22 | 22 | 22 | 22 |
| Skill 5 | Pearson Correlation | .469* | .453* | .512* | .812** | 1 | .846** |
| Sig. (2-tailed) | .028 | .034 | .015 | .000 |  | .000 |
| N | 22 | 22 | 22 | 22 | 22 | 22 |
| Totall | Pearson Correlation | .669** | .722** | .684** | .838** | .846** | 1 |
| Sig. (2-tailed) | .001 | .000 | .000 | .000 | .000 |  |
| N | 22 | 22 | 22 | 22 | 22 | 22 |
| *. Correlation is significant at the 0.05 level (2-tailed). | | | | | | | |
| **. Correlation is significant at the 0.01 level (2-tailed). | | | | | | | |

**"The difference between the experimental and control groups in the pre-test (creative writing skills)"**

| **Group Statistics** | | | | | |
| --- | --- | --- | --- | --- | --- |
|  | "The two groups" | N | Mean | Std. Deviation | Std. Error Mean |
| Skill 1 Pre | Experimental | 45 | 4.2667 | 1.78885 | .26667 |
| The control | 45 | 4.5333 | 2.07364 | .30912 |
| Skill 2 Pre | Experimental | 45 | 4.2667 | 2.14688 | .32004 |
| The control | 45 | 4.0889 | 1.90481 | .28395 |
| Skill 3 Pre | Experimental | 45 | 3.7556 | 1.97893 | .29500 |
| The control | 45 | 3.5778 | 1.82768 | .27245 |
| Skill 4 Pre | Experimental | 45 | 4.1333 | 2.13839 | .31877 |
| The control | 45 | 4.3111 | 2.30437 | .34351 |
| Skill 5 Pre | Experimental | 45 | 3.6222 | 1.55635 | .23201 |
| The control | 45 | 3.4889 | 1.35885 | .20256 |
| Total _ Pre | Experimental | 45 | 20.0444 | 7.17304 | 1.06929 |
| The control | 45 | 20.0000 | 5.78792 | .86281 |

| **Independent Samples Test** | | | | | | | | | | |
| --- | --- | --- | --- | --- | --- | --- | --- | --- | --- | --- |
|  | | Levene's Test for Equality of Variances | | t-test for Equality of Means | | | | | | |
| F | Sig. | t | df | Sig. (2-tailed) | Mean Difference | Std. Error Difference | 95% Confidence Interval of the Difference | |
| Lower | Upper |
| Skill 1 Pre | Equal variances assumed | 1.349 | .249 | -.653- | 88 | .515 | -.26667- | .40825 | -1.07797- | .54464 |
| Equal variances not assumed |  |  | -.653- | 86.147 | .515 | -.26667- | .40825 | -1.07822- | .54488 |
| Skill 2 Pre | Equal variances assumed | .723 | .398 | .416 | 88 | .679 | .17778 | .42785 | -.67248- | 1.02803 |
| Equal variances not assumed |  |  | .416 | 86.770 | .679 | .17778 | .42785 | -.67265- | 1.02820 |
| Skill 3 Pre | Equal variances assumed | .707 | .403 | .443 | 88 | .659 | .17778 | .40157 | -.62025- | .97581 |
| Equal variances not assumed |  |  | .443 | 87.449 | .659 | .17778 | .40157 | -.62032- | .97588 |
| Skill 4 Pre | Equal variances assumed | .441 | .508 | -.379- | 88 | .705 | -.17778- | .46863 | -1.10909- | .75354 |
| Equal variances not assumed |  |  | -.379- | 87.513 | .705 | -.17778- | .46863 | -1.10916- | .75361 |
| Skill 5 Pre | Equal variances assumed | .489 | .486 | .433 | 88 | .666 | .13333 | .30799 | -.47874- | .74540 |
| Equal variances not assumed |  |  | .433 | 86.428 | .666 | .13333 | .30799 | -.47889- | .74556 |
| Total _ Pre | Equal variances assumed | 5.809 | .018 | .032 | 88 | .974 | .04444 | 1.37398 | -2.68606- | 2.77495 |
| Equal variances not assumed |  |  | .032 | 84.238 | .974 | .04444 | 1.37398 | -2.68776- | 2.77665 |

**"The difference between the experimental and control groups in the post-test (creative writing skills)"**

| **Group Statistics** | | | | | |
| --- | --- | --- | --- | --- | --- |
|  | The two groups | N | Mean | Std. Deviation | Std. Error Mean |
| Skill 1 Post | Experimental | 45 | 7.2444 | 1.22763 | .18300 |
| Control | 45 | 5.8889 | 1.68175 | .25070 |
| Skill 2 Post | Experimental | 45 | 6.9333 | 1.48324 | .22111 |
| Control | 45 | 5.7111 | 1.45574 | .21701 |
| Skill 3 Post | Experimental | 45 | 7.0222 | 1.49983 | .22358 |
| Control | 45 | 5.7333 | 1.40454 | .20938 |
| Skill 4 Post | Experimental | 45 | 6.9556 | 1.75752 | .26200 |
| Control | 45 | 5.8000 | 1.27208 | .18963 |
| Skill 5 Post | Experimental | 45 | 6.6889 | 1.91670 | .28572 |
| Control | 45 | 5.5333 | 1.28982 | .19228 |
| Total _ Post | Experimental | 45 | 34.8444 | 6.56075 | .97802 |
| Control | 45 | 28.6667 | 5.58407 | .83242 |

| **Independent Samples Test** | | | | | | | | | | |
| --- | --- | --- | --- | --- | --- | --- | --- | --- | --- | --- |
|  | | Levene's Test for Equality of Variances | | t-test for Equality of Means | | | | | | |
| F | Sig. | t | df | Sig. (2-tailed) | Mean Difference | Std. Error Difference | 95% Confidence Interval of the Difference | |
| Lower | Upper |
| Skill 1 Post | Equal variances assumed | 3.137 | .080 | 4.367 | 88 | .000 | 1.35556 | .31039 | .73872 | 1.97239 |
| Equal variances not assumed |  |  | 4.367 | 80.522 | .000 | 1.35556 | .31039 | .73792 | 1.97319 |
| Skill 2 Post | Equal variances assumed | 1.515 | .222 | 3.945 | 88 | .000 | 1.22222 | .30981 | .60654 | 1.83790 |
| Equal variances not assumed |  |  | 3.945 | 87.969 | .000 | 1.22222 | .30981 | .60654 | 1.83791 |
| Skill 3 Post | Equal variances assumed | .798 | .374 | 4.208 | 88 | .000 | 1.28889 | .30631 | .68016 | 1.89762 |
| Equal variances not assumed |  |  | 4.208 | 87.623 | .000 | 1.28889 | .30631 | .68012 | 1.89766 |
| Skill 4 Post | Equal variances assumed | 7.157 | .009 | 3.573 | 88 | .001 | 1.15556 | .32342 | .51282 | 1.79829 |
| Equal variances not assumed |  |  | 3.573 | 80.173 | .001 | 1.15556 | .32342 | .51195 | 1.79916 |
| Skill 5 Post | Equal variances assumed | 20.035 | .000 | 3.355 | 88 | .001 | 1.15556 | .34440 | .47114 | 1.83997 |
| Equal variances not assumed |  |  | 3.355 | 77.069 | .001 | 1.15556 | .34440 | .46979 | 1.84132 |
| Total _ Post | Equal variances assumed | 3.948 | .050 | 4.810 | 88 | .000 | 6.17778 | 1.28431 | 3.62548 | 8.73007 |
| Equal variances not assumed |  |  | 4.810 | 85.809 | .000 | 6.17778 | 1.28431 | 3.62457 | 8.73098 |

"Eta-squared"

| **Measures of Association** | | |
| --- | --- | --- |
|  | Eta | Eta Squared |
| Skill 1 Post * The two groups | .422 | .178 |
| Skill 2 Post * The two groups | .388 | .150 |
| Skill 3 Post * The two groups | .409 | .167 |
| Skill 4 Post * The two groups | .356 | .127 |
| Skill 5 Post * The two groups | .337 | .113 |
| Total Post * The two groups | .456 | .208 |

"The difference between the pre-test and post-test for the experimental group (creative writing skills)"

| **Paired Samples Statistics** | | | | | |
| --- | --- | --- | --- | --- | --- |
|  | | Mean | N | Std. Deviation | Std. Error Mean |
| Pair 1 | Skill 1 Pre | 4.2667 | 45 | 1.78885 | .26667 |
| Skill 1 Post | 7.2444 | 45 | 1.22763 | .18300 |
| Pair 2 | Skill 2 Pre | 4.2667 | 45 | 2.14688 | .32004 |
| Skill 2 Post | 6.9333 | 45 | 1.48324 | .22111 |
| Pair 3 | Skill 3 Pre | 3.7556 | 45 | 1.97893 | .29500 |
| Skill 3 Post | 7.0222 | 45 | 1.49983 | .22358 |
| Pair 4 | Skill 4 Pre | 4.1333 | 45 | 2.13839 | .31877 |
| Skill 4 Post | 6.9556 | 45 | 1.75752 | .26200 |
| Pair 5 | Skill 5 Pre | 3.6222 | 45 | 1.55635 | .23201 |
| Skill 5 Post | 6.6889 | 45 | 1.91670 | .28572 |
| Pair 6 | Skill 6 Pre | 20.0444 | 45 | 7.17304 | 1.06929 |
| Skill 6 Post | 34.8444 | 45 | 6.56075 | .97802 |

| **Paired Samples Correlations** | | | | |
| --- | --- | --- | --- | --- |
|  | | N | Correlation | Sig. |
| Pair 1 | "Skill 1 Pre & Skill 1 Post" | 45 | .622 | .000 |
| Pair 2 | "Skill 2 Pre & Skill 2 Post" | 45 | .727 | .000 |
| Pair 3 | "Skill 3 Pre & Skill 3 Post" | 45 | .461 | .001 |
| Pair 4 | "Skill 4 Pre & Skill 4 Post" | 45 | .776 | .000 |
| Pair 5 | "Skill 5 Pre & Skill 5 Post" | 45 | .699 | .000 |
| Pair 6 | Total Pre & Total Post | 45 | .850 | .000 |

| **Paired Samples Test** | | | | | | | | | |
| --- | --- | --- | --- | --- | --- | --- | --- | --- | --- |
|  | | Paired Differences | | | | | t | df | Sig. (2-tailed) |
| Mean | Std. Deviation | Std. Error Mean | 95% Confidence Interval of the Difference | |  |  |  |
| Lower | Upper |
| Pair 1 | Skill 1 Pre & Skill 1Post | -2.97778- | 1.40598 | .20959 | -3.40018- | -2.55538- | -14.208- | 44 | .000 |
| Pair 2 | Skill 2 Pre & Skill 2Post | -2.66667- | 1.47710 | .22019 | -3.11044- | -2.22290- | -12.111- | 44 | .000 |
| Pair 3 | Skill 3 Pre & Skill 3Post | -3.26667- | 1.85129 | .27597 | -3.82286- | -2.71048- | -11.837- | 44 | .000 |
| Pair 4 | Skill 4 Pre & Skill 4Post | -2.82222- | 1.35326 | .20173 | -3.22879- | -2.41566- | -13.990- | 44 | .000 |
| Pair 5 | Skill 5 Pre & Skill 5Post | -3.06667- | 1.38826 | .20695 | -3.48375- | -2.64959- | -14.818- | 44 | .000 |
| Pair 6 | Total Pre - Total Post | -14.80000- | 3.80550 | .56729 | -15.94330- | -13.65670- | -26.089- | 44 | .000 |

|  |  | t | df | Sig. (2-tailed) |
| --- | --- | --- | --- | --- |
| 95% Confidence Interval of the Difference | |
| Lower | Upper |
| -3.40018- | -2.55538- | 14.208- | 44 | .000 |
| -3.11044- | -2.22290- | 12.111- | 44 | .000 |
| -3.82286- | -2.71048- | 11.837- | 44 | .000 |
| -3.22879- | -2.41566- | 13.990- | 44 | .000 |
| -3.48375- | -2.64959- | 14.818- | 44 | .000 |
| -15.94330- | -13.65670- | 26.089- | 44 | .000 |
